# Supplementary material
Source: PubMed Central journal article supplement (PMC4797241)
Supplement: Supplementary_Material_998.pdf [file Supplementary_Material_998.pdf]

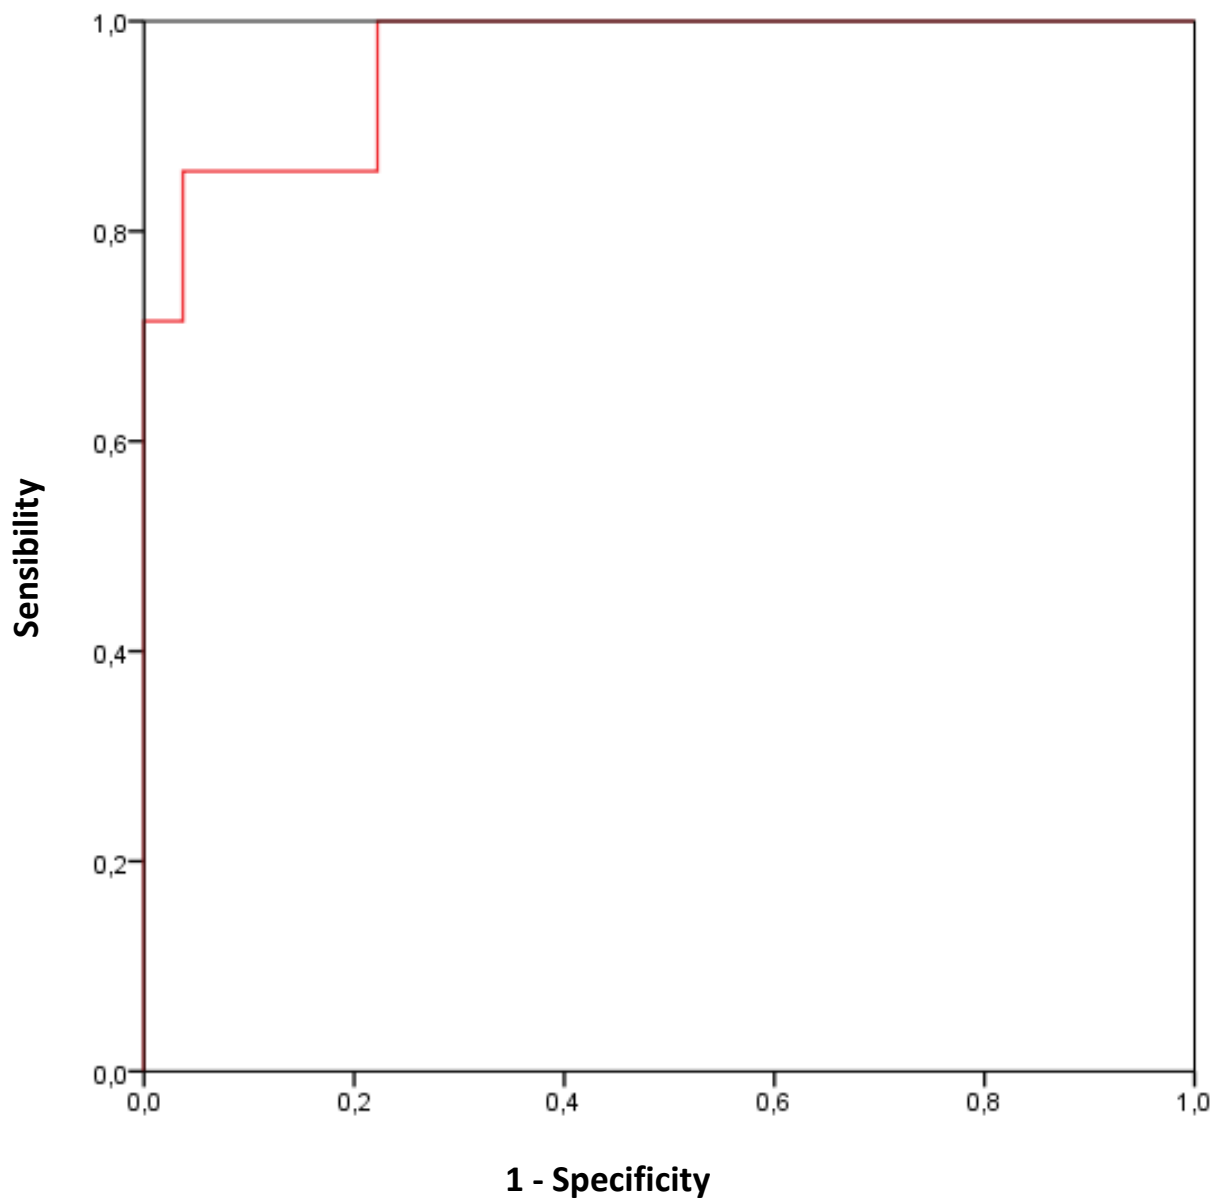

Receiver Operating Characteristic curve constructed with the probability values predicted with the logistic regression model, using no response as the state variable. AUC, area under the curve: 0.963; 95% confidence interval of AUC: 0.896–1.000 ( $p < 0.001$ ).
